# Supplementary material
Source: PubMed Central journal article supplement (PMC10464525)
Supplement: NIHMS1920147-supplement-Supp1.pdf [file NIHMS1920147-supplement-Supp1.pdf]

Supplemental Table. Factors Contributing to the Rate of MvD Angle change Over Time: Univariable and Multivariable Mixed Model Analyses

| Variables                                    | Univariable Model   |              | Multivariable Model 1<br>(includes peak IOP) |         | Multivariable Model 2<br>(includes IOP fluctuation) |              | Multivariable Model 3<br>(includes number of glaucoma medications) |              |
|----------------------------------------------|---------------------|--------------|----------------------------------------------|---------|-----------------------------------------------------|--------------|--------------------------------------------------------------------|--------------|
|                                              | $\beta$ , 95 % CI   | P value      | $\beta$ , 95 % CI                            | P value | $\beta$ , 95 % CI                                   | P value      | $\beta$ , 95 % CI                                                  | P value      |
| Baseline Age, per 10 years older             | 0.34 (-1.62, 2.30)  | 0.735        | 1.13 (-0.85, 3.10)                           | 0.263   | 1.11 (-0.82, 3.04)                                  | 0.259        | 0.70 (-1.17, 2.58)                                                 | 0.463        |
| Gender: Female                               | -1.14 (-5.63, 3.36) | 0.621        |                                              |         |                                                     |              |                                                                    |              |
| Race:                                        |                     |              |                                              |         |                                                     |              |                                                                    |              |
| African American                             | -2.17 (-7.22, 2.87) | 0.399        |                                              |         |                                                     |              |                                                                    |              |
| Self-reported hypertension                   | -2.27 (-6.92, 2.39) | 0.340        |                                              |         |                                                     |              |                                                                    |              |
| Self-reported diabetes                       | -2.66 (-9.01, 3.69) | 0.412        |                                              |         |                                                     |              |                                                                    |              |
| Axial length, per 1mm longer                 | 0.47 (-1.69, 2.64)  | 0.668        |                                              |         |                                                     |              |                                                                    |              |
| CCT, per 100 $\mu$ m thinner                 | -0.94 (-6.19, 4.30) | 0.724        |                                              |         |                                                     |              |                                                                    |              |
| Baseline VF MD, per 1 dB worse               | 0.35 (-0.07, 0.77)  | 0.104        | 0.38 (-0.05, 0.82)                           | 0.086   | 0.36 (-0.06, 0.78)                                  | 0.096        | 0.18 (-0.25, 0.61)                                                 | 0.401        |
| Baseline IOP, per 1 mmHg higher              | 0.13 (-0.39, 0.66)  | 0.615        |                                              |         |                                                     |              |                                                                    |              |
| Mean IOP during follow-up, per 1 mmHg higher | 0.17 (-0.43, 0.78)  | 0.570        |                                              |         |                                                     |              |                                                                    |              |
| Peak IOP during follow-up, per 1 mmHg higher | 0.28 (-0.16, 0.71)  | 0.212        | 0.36 (-0.08, 0.80)                           | 0.110   |                                                     |              |                                                                    |              |
| IOP fluctuation, per 1 mmHg higher           | 1.57 (0.06, 3.09)   | <b>0.041</b> |                                              |         | 1.65 (0.016, 3.15)                                  | <b>0.030</b> |                                                                    |              |
| IOP follow-up visits (n)                     | 0.96 (-0.16, 2.09)  | 0.092        | 0.73 (-0.39, 1.86)                           | 0.203   | 0.67 (-0.45, 1.78)                                  | 0.240        |                                                                    |              |
| No. of medication during the follow-up (n)   | 2.73 (1.05, 4.41)   | <b>0.001</b> |                                              |         |                                                     |              | 2.53 (0.77, 4.28)                                                  | <b>0.005</b> |

Glaucoma medication use during the follow-up

|                                     |                     |              |
|-------------------------------------|---------------------|--------------|
| Prostaglandin, yes                  | 6.37 (0.76, 11.97)  | <b>0.026</b> |
| β-blocker, yes                      | 4.90 (0.45, 9.35)   | <b>0.031</b> |
| CAI, yes                            | 3.51 (-0.94, 7.95)  | 0.122        |
| Brimonidine, yes                    | 6.37 (1.74, 11.00)  | <b>0.007</b> |
| Scan Quality Score, per 1 higher    | -2.92 (-6.41, 0.57) | 0.101        |
| Follow-up period, per 1 year longer | 3.05 (-0.35, 6.45)  | 0.079        |
| No. of follow-up visits             | 1.63 (0.02, 3.24)   | <b>0.047</b> |

CCT = central corneal thickness; IOP = intraocular pressure; MD = mean deviation; MvD = microvascular dropout; VF = visual field. Values are shown in β coefficient (95% confidence interval). The value of MvD area was multiplied by one hundred to enhance the readability of the Table. Statistically significant P values are shown in bold.
